# Supplementary material
Source: publisher figshare collection journal article supplement (https://acs.figshare.com/ndownloader/files/4769548)
Supplement: Supplementary file 1 [file 4769548]

 
data_0207 
 
_audit_creation_method            SHELXL-97 
_chemical_name_systematic 
; 
 ? 
; 
_chemical_name_common             ? 
_chemical_melting_point           ? 
_chemical_formula_moiety          ? 
_chemical_formula_sum 
 'C32 H28 N2 Ni O4 S8' 
_chemical_formula_weight          819.75 
 
loop_ 
 _atom_type_symbol 
 _atom_type_description 
 _atom_type_scat_dispersion_real 
 _atom_type_scat_dispersion_imag 
 _atom_type_scat_source 
 'C'  'C'   0.0033   0.0016 
 'International Tables Vol C Tables 4.2.6.8 and 6.1.1.4' 
 'H'  'H'   0.0000   0.0000 
 'International Tables Vol C Tables 4.2.6.8 and 6.1.1.4' 
 'N'  'N'   0.0061   0.0033 
 'International Tables Vol C Tables 4.2.6.8 and 6.1.1.4' 
 'O'  'O'   0.0106   0.0060 
 'International Tables Vol C Tables 4.2.6.8 and 6.1.1.4' 
 'S'  'S'   0.1246   0.1234 
 'International Tables Vol C Tables 4.2.6.8 and 6.1.1.4' 
 'Ni'  'Ni'   0.3393   1.1124 
 'International Tables Vol C Tables 4.2.6.8 and 6.1.1.4' 
 
_symmetry_cell_setting            ? 
_symmetry_space_group_name_H-M    ? 
 
loop_ 
 _symmetry_equiv_pos_as_xyz 
 'x, y, z' 
 '-x, y+1/2, -z+1/2' 
 '-x, -y, -z' 
 'x, -y-1/2, z-1/2' 
 
_cell_length_a                    7.3220(5) 
_cell_length_b                    8.5055(5) 
_cell_length_c                    28.6082(18) 
_cell_angle_alpha                 90.00 
_cell_angle_beta                  97.2040(10) 
_cell_angle_gamma                 90.00 
_cell_volume                      1767.58(19) 
_cell_formula_units_Z             2 
_cell_measurement_temperature     293(2) 
_cell_measurement_reflns_used     ? 
_cell_measurement_theta_min       ? 
_cell_measurement_theta_max       ? 
 
_exptl_crystal_description        ? 
_exptl_crystal_colour             ? 
_exptl_crystal_size_max           0.48 
_exptl_crystal_size_mid           0.18 
_exptl_crystal_size_min           0.04 
_exptl_crystal_density_meas       ? 
_exptl_crystal_density_diffrn     1.540 
_exptl_crystal_density_method     'not measured' 
_exptl_crystal_F_000              844 
_exptl_absorpt_coefficient_mu     1.061 
_exptl_absorpt_correction_type    ? 
_exptl_absorpt_correction_T_min   0.6287 
_exptl_absorpt_correction_T_max   0.9558 
_exptl_absorpt_process_details    ? 
 
_exptl_special_details 
; 
 ? 
; 
 
_diffrn_ambient_temperature       293(2) 
_diffrn_radiation_wavelength      0.71073 
_diffrn_radiation_type            MoK\a 
_diffrn_radiation_source          'fine-focus sealed tube' 
_diffrn_radiation_monochromator   graphite 
_diffrn_measurement_device_type   ? 
_diffrn_measurement_method        ? 
_diffrn_detector_area_resol_mean  ? 
_diffrn_standards_number          ? 
_diffrn_standards_interval_count  ? 
_diffrn_standards_interval_time   ? 
_diffrn_standards_decay_%         ? 
_diffrn_reflns_number             9625 
_diffrn_reflns_av_R_equivalents   0.0581 
_diffrn_reflns_av_sigmaI/netI     0.0448 
_diffrn_reflns_limit_h_min        -9 
_diffrn_reflns_limit_h_max        8 
_diffrn_reflns_limit_k_min        -10 
_diffrn_reflns_limit_k_max        10 
_diffrn_reflns_limit_l_min        -35 
_diffrn_reflns_limit_l_max        24 
_diffrn_reflns_theta_min          2.99 
_diffrn_reflns_theta_max          26.07 
_reflns_number_total              3451 
_reflns_number_gt                 2885 
_reflns_threshold_expression      >2sigma(I) 
 
_computing_data_collection        ? 
_computing_cell_refinement        ? 
_computing_data_reduction         ? 
_computing_structure_solution     'SHELXS-97 (Sheldrick, 1990)' 
_computing_structure_refinement   'SHELXL-97 (Sheldrick, 1997)' 
_computing_molecular_graphics     ? 
_computing_publication_material   ? 
 
_refine_special_details 
; 
 Refinement of F^2^ against ALL reflections.  The weighted R-factor wR and 
 goodness of fit S are based on F^2^, conventional R-factors R are based 
 on F, with F set to zero for negative F^2^. The threshold expression of 
 F^2^ > 2sigma(F^2^) is used only for calculating R-factors(gt) etc. and is 
 not relevant to the choice of reflections for refinement.  R-factors based 
 on F^2^ are statistically about twice as large as those based on F, and R- 
 factors based on ALL data will be even larger. 
; 
 
_refine_ls_structure_factor_coef  Fsqd  
_refine_ls_matrix_type            full 
_refine_ls_weighting_scheme       calc  
_refine_ls_weighting_details 
 'calc w=1/[\s^2^(Fo^2^)+(0.0740P)^2^+0.0000P] where P=(Fo^2^+2Fc^2^)/3' 
_atom_sites_solution_primary      direct 
_atom_sites_solution_secondary    difmap 
_atom_sites_solution_hydrogens    geom 
_refine_ls_hydrogen_treatment     mixed 
_refine_ls_extinction_method      none 
_refine_ls_extinction_coef        ? 
_refine_ls_number_reflns          3451 
_refine_ls_number_parameters      216 
_refine_ls_number_restraints      0 
_refine_ls_R_factor_all           0.0506 
_refine_ls_R_factor_gt            0.0429 
_refine_ls_wR_factor_ref          0.1212 
_refine_ls_wR_factor_gt           0.1159 
_refine_ls_goodness_of_fit_ref    1.047 
_refine_ls_restrained_S_all       1.047 
_refine_ls_shift/su_max           0.000 
_refine_ls_shift/su_mean          0.000 
 
loop_ 
 _atom_site_label 
 _atom_site_type_symbol 
 _atom_site_fract_x 
 _atom_site_fract_y 
 _atom_site_fract_z 
 _atom_site_U_iso_or_equiv 
 _atom_site_adp_type 
 _atom_site_occupancy 
 _atom_site_symmetry_multiplicity 
 _atom_site_calc_flag 
 _atom_site_refinement_flags 
 _atom_site_disorder_assembly 
 _atom_site_disorder_group 
Ni Ni 0.5000 0.0000 0.0000 0.03844(16) Uani 1 2 d S . . 
O1 O 0.6868(2) 0.0878(2) 0.05162(6) 0.0452(4) Uani 1 1 d . . . 
O2 O 0.3375(2) 0.18993(19) 0.00128(6) 0.0443(4) Uani 1 1 d . . . 
S1 S 0.03696(11) -0.49747(9) 0.23226(3) 0.0616(2) Uani 1 1 d . . . 
S2 S -0.14315(9) -0.26546(9) 0.16527(2) 0.0485(2) Uani 1 1 d . . . 
S3 S -0.24462(10) -0.42374(9) 0.30605(3) 0.0574(2) Uani 1 1 d . . . 
S4 S -0.45430(9) -0.20920(9) 0.23801(3) 0.0523(2) Uani 1 1 d . . . 
N N 0.3559(3) -0.1080(2) 0.05060(7) 0.0411(5) Uani 1 1 d . . . 
C1 C 0.8359(4) 0.2674(4) 0.10595(11) 0.0682(9) Uani 1 1 d . . . 
H1A H 0.8465 0.1940 0.1317 0.068 Uiso 1 1 calc R . . 
H1B H 0.8161 0.3711 0.1176 0.068 Uiso 1 1 calc R . . 
H1C H 0.9471 0.2661 0.0914 0.068 Uiso 1 1 calc R . . 
C2 C 0.6745(4) 0.2213(3) 0.06991(9) 0.0436(6) Uani 1 1 d . . . 
C3 C 0.5274(4) 0.3257(3) 0.06026(10) 0.0548(7) Uani 1 1 d . . . 
H3 H 0.5346 0.4189 0.0774 0.055 Uiso 1 1 calc R . . 
C4 C 0.3711(4) 0.3054(3) 0.02776(9) 0.0430(6) Uani 1 1 d . . . 
C5 C 0.2255(5) 0.4318(4) 0.02272(12) 0.0675(9) Uani 1 1 d . . . 
H5A H 0.1155 0.3917 0.0049 0.067 Uiso 1 1 calc R . . 
H5B H 0.2692 0.5207 0.0067 0.067 Uiso 1 1 calc R . . 
H5C H 0.1991 0.4634 0.0534 0.067 Uiso 1 1 calc R . . 
C6 C 0.1760(4) -0.0856(3) 0.05296(9) 0.0508(7) Uani 1 1 d . . . 
H6 H 0.1121 -0.0192 0.0308 0.051 Uiso 1 1 calc R . . 
C7 C 0.0799(3) -0.1538(3) 0.08570(9) 0.0471(6) Uani 1 1 d . . . 
H7 H -0.0451 -0.1336 0.0853 0.047 Uiso 1 1 calc R . . 
C8 C 0.1710(3) -0.2540(3) 0.11971(9) 0.0400(6) Uani 1 1 d . . . 
C9 C 0.3587(3) -0.2776(3) 0.11706(8) 0.0428(6) Uani 1 1 d . . . 
H9 H 0.4263 -0.3435 0.1387 0.043 Uiso 1 1 calc R . . 
C10 C 0.4436(3) -0.2047(3) 0.08299(8) 0.0438(6) Uani 1 1 d . . . 
H10 H 0.5684 -0.2233 0.0823 0.044 Uiso 1 1 calc R . . 
C11 C 0.0812(3) -0.3254(3) 0.15693(9) 0.0413(6) Uani 1 1 d . . . 
C12 C 0.1558(4) -0.4336(3) 0.18721(10) 0.0521(7) Uani 1 1 d . . . 
H12 H 0.2714 -0.4746 0.1841 0.052 Uiso 1 1 calc R . . 
C13 C -0.1436(3) -0.3639(3) 0.21950(9) 0.0431(6) Uani 1 1 d . . . 
C14 C -0.2662(3) -0.3360(3) 0.24996(9) 0.0434(6) Uani 1 1 d . . . 
C15 C -0.5304(5) -0.2341(4) 0.29261(11) 0.0652(9) Uani 1 1 d . . . 
H15 H -0.6348 -0.1824 0.3001 0.065 Uiso 1 1 calc R . . 
C16 C -0.4347(5) -0.3296(4) 0.32333(12) 0.0689(9) Uani 1 1 d . . . 
H16 H -0.4688 -0.3452 0.3532 0.069 Uiso 1 1 calc R . . 
 
loop_ 
 _atom_site_aniso_label 
 _atom_site_aniso_U_11 
 _atom_site_aniso_U_22 
 _atom_site_aniso_U_33 
 _atom_site_aniso_U_23 
 _atom_site_aniso_U_13 
 _atom_site_aniso_U_12 
Ni 0.0367(3) 0.0403(3) 0.0361(3) -0.00288(18) -0.00408(19) 0.01212(18) 
O1 0.0418(10) 0.0484(11) 0.0422(10) -0.0054(8) -0.0068(7) 0.0103(8) 
O2 0.0415(10) 0.0444(10) 0.0449(10) -0.0022(8) -0.0024(8) 0.0149(8) 
S1 0.0548(5) 0.0554(5) 0.0760(6) 0.0238(4) 0.0139(4) 0.0164(3) 
S2 0.0391(4) 0.0610(4) 0.0441(4) 0.0035(3) 0.0007(3) 0.0127(3) 
S3 0.0548(5) 0.0602(5) 0.0564(5) 0.0135(3) 0.0038(3) -0.0080(3) 
S4 0.0443(4) 0.0564(4) 0.0555(5) -0.0020(3) 0.0040(3) 0.0054(3) 
N 0.0366(11) 0.0447(12) 0.0398(12) -0.0012(9) -0.0031(9) 0.0094(9) 
C1 0.0540(18) 0.081(2) 0.066(2) -0.0227(17) -0.0050(15) -0.0014(16) 
C2 0.0437(14) 0.0539(16) 0.0333(13) -0.0016(11) 0.0046(11) -0.0012(12) 
C3 0.0603(18) 0.0491(16) 0.0540(17) -0.0157(13) 0.0036(14) 0.0098(14) 
C4 0.0457(14) 0.0414(14) 0.0434(14) -0.0001(11) 0.0110(11) 0.0112(11) 
C5 0.0636(19) 0.0578(19) 0.080(2) -0.0130(16) 0.0033(16) 0.0262(16) 
C6 0.0417(15) 0.0572(17) 0.0504(16) 0.0062(13) -0.0062(12) 0.0146(13) 
C7 0.0362(13) 0.0550(16) 0.0483(15) -0.0006(12) -0.0012(11) 0.0107(12) 
C8 0.0395(14) 0.0378(12) 0.0411(14) -0.0092(11) -0.0011(10) 0.0054(10) 
C9 0.0399(14) 0.0483(14) 0.0378(14) 0.0000(11) -0.0049(11) 0.0168(11) 
C10 0.0345(13) 0.0548(15) 0.0401(14) -0.0012(11) -0.0031(10) 0.0126(11) 
C11 0.0369(13) 0.0413(13) 0.0436(14) -0.0094(11) -0.0033(10) 0.0052(11) 
C12 0.0429(15) 0.0459(15) 0.0678(19) 0.0069(13) 0.0077(13) 0.0118(12) 
C13 0.0402(13) 0.0377(13) 0.0495(15) -0.0011(11) -0.0020(11) 0.0001(11) 
C14 0.0418(14) 0.0390(13) 0.0471(15) 0.0003(11) -0.0028(11) -0.0056(11) 
C15 0.068(2) 0.0618(19) 0.070(2) -0.0087(16) 0.0249(17) 0.0019(16) 
C16 0.082(2) 0.072(2) 0.0575(19) -0.0017(16) 0.0262(18) -0.0052(18) 
 
_geom_special_details 
; 
 All esds (except the esd in the dihedral angle between two l.s. planes) 
 are estimated using the full covariance matrix.  The cell esds are taken 
 into account individually in the estimation of esds in distances, angles 
 and torsion angles; correlations between esds in cell parameters are only 
 used when they are defined by crystal symmetry.  An approximate (isotropic) 
 treatment of cell esds is used for estimating esds involving l.s. planes. 
; 
 
loop_ 
 _geom_bond_atom_site_label_1 
 _geom_bond_atom_site_label_2 
 _geom_bond_distance 
 _geom_bond_site_symmetry_2 
 _geom_bond_publ_flag 
Ni O2 2.0094(16) . ? 
Ni O2 2.0094(16) 3_655 ? 
Ni O1 2.0255(16) . ? 
Ni O1 2.0255(16) 3_655 ? 
Ni N 2.106(2) . ? 
Ni N 2.106(2) 3_655 ? 
O1 C2 1.258(3) . ? 
O2 C4 1.246(3) . ? 
S1 C12 1.730(3) . ? 
S1 C13 1.746(3) . ? 
S2 C13 1.763(3) . ? 
S2 C11 1.765(2) . ? 
S3 C16 1.731(3) . ? 
S3 C14 1.759(3) . ? 
S4 C15 1.736(3) . ? 
S4 C14 1.749(3) . ? 
N C6 1.341(3) . ? 
N C10 1.341(3) . ? 
C1 C2 1.519(4) . ? 
C2 C3 1.397(4) . ? 
C3 C4 1.392(4) . ? 
C4 C5 1.508(4) . ? 
C6 C7 1.369(4) . ? 
C7 C8 1.398(3) . ? 
C8 C9 1.400(3) . ? 
C8 C11 1.453(4) . ? 
C9 C10 1.368(3) . ? 
C11 C12 1.333(4) . ? 
C13 C14 1.348(4) . ? 
C15 C16 1.330(5) . ? 
 
loop_ 
 _geom_angle_atom_site_label_1 
 _geom_angle_atom_site_label_2 
 _geom_angle_atom_site_label_3 
 _geom_angle 
 _geom_angle_site_symmetry_1 
 _geom_angle_site_symmetry_3 
 _geom_angle_publ_flag 
O2 Ni O2 180.00(11) . 3_655 ? 
O2 Ni O1 92.15(7) . . ? 
O2 Ni O1 87.85(7) 3_655 . ? 
O2 Ni O1 87.85(7) . 3_655 ? 
O2 Ni O1 92.15(7) 3_655 3_655 ? 
O1 Ni O1 180.00(7) . 3_655 ? 
O2 Ni N 89.39(7) . . ? 
O2 Ni N 90.61(7) 3_655 . ? 
O1 Ni N 90.58(7) . . ? 
O1 Ni N 89.42(7) 3_655 . ? 
O2 Ni N 90.61(7) . 3_655 ? 
O2 Ni N 89.39(7) 3_655 3_655 ? 
O1 Ni N 89.42(7) . 3_655 ? 
O1 Ni N 90.58(7) 3_655 3_655 ? 
N Ni N 180.00(15) . 3_655 ? 
C2 O1 Ni 123.99(16) . . ? 
C4 O2 Ni 124.91(16) . . ? 
C12 S1 C13 94.50(13) . . ? 
C13 S2 C11 94.94(12) . . ? 
C16 S3 C14 94.63(15) . . ? 
C15 S4 C14 94.73(15) . . ? 
C6 N C10 116.1(2) . . ? 
C6 N Ni 123.54(17) . . ? 
C10 N Ni 120.33(16) . . ? 
O1 C2 C3 125.8(2) . . ? 
O1 C2 C1 115.1(2) . . ? 
C3 C2 C1 119.0(2) . . ? 
C4 C3 C2 127.0(2) . . ? 
O2 C4 C3 126.0(2) . . ? 
O2 C4 C5 114.8(2) . . ? 
C3 C4 C5 119.2(2) . . ? 
N C6 C7 124.5(2) . . ? 
C6 C7 C8 119.5(2) . . ? 
C7 C8 C9 115.8(2) . . ? 
C7 C8 C11 123.0(2) . . ? 
C9 C8 C11 121.2(2) . . ? 
C10 C9 C8 120.7(2) . . ? 
N C10 C9 123.3(2) . . ? 
C12 C11 C8 125.4(2) . . ? 
C12 C11 S2 115.1(2) . . ? 
C8 C11 S2 119.53(18) . . ? 
C11 C12 S1 119.8(2) . . ? 
C14 C13 S1 121.8(2) . . ? 
C14 C13 S2 124.0(2) . . ? 
S1 C13 S2 114.07(15) . . ? 
C13 C14 S4 123.6(2) . . ? 
C13 C14 S3 121.6(2) . . ? 
S4 C14 S3 114.74(15) . . ? 
C16 C15 S4 117.9(3) . . ? 
C15 C16 S3 118.0(2) . . ? 
 
loop_ 
 _geom_hbond_atom_site_label_D 
 _geom_hbond_atom_site_label_H 
 _geom_hbond_atom_site_label_A 
 _geom_hbond_distance_DH 
 _geom_hbond_distance_HA 
 _geom_hbond_distance_DA 
 _geom_hbond_angle_DHA 
 _geom_hbond_site_symmetry_A 
C5 H5B C3  0.96 2.88 3.774(5) 154.9 3_665 
C10 H10 S2  0.93 3.00 3.630(3) 126.8 1_655 
C16 H16 C2  0.93 2.87 3.734(4) 154.5 2_545 
 
_diffrn_measured_fraction_theta_max    0.989 
_diffrn_reflns_theta_full              26.07 
_diffrn_measured_fraction_theta_full   0.989 
_refine_diff_density_max    0.581 
_refine_diff_density_min   -0.274 
_refine_diff_density_rms    0.079 
